# Supplementary material for: Perovskite/organic hybrid tandem light-emitting diodes with an external quantum efficiency of over 40%
Source: Royal Society of Chemistry journal article supplement (doi:10.1039/d3tc03466f), 2024-01-01
Supplement: d3tc03466f1.pdf [file d3tc03466f1.pdf]

## Supporting Information

### Perovskite/Organic Hybrid Tandem Light-Emitting Diodes with External Quantum Efficiency Over 40%

Min Zhu,<sup>‡a</sup> Shuang-Qiao Sun,<sup>‡a</sup> Wei He,<sup>a</sup> Yan-Lin Xu,<sup>a</sup> Qi Sun,<sup>a</sup> Yue-Min Xie,<sup>\*a,c</sup> Man-Keung Fung,<sup>\*a,b</sup> Shuit-Tong Lee<sup>\*a,b</sup>

<sup>a</sup>Institute of Functional Nano & Soft Materials (FUNSOM), Jiangsu Key Laboratory for Carbon-Based Functional Materials & Devices, Soochow University, Suzhou, 215123, Jiangsu, PR China

E-mail: [apannale@suda.edu.cn](mailto:apannale@suda.edu.cn); [mkfung@suda.edu.cn](mailto:mkfung@suda.edu.cn); [ymxie@suda.edu.cn](mailto:ymxie@suda.edu.cn)

<sup>b</sup>Macao Institute of Materials Science and Engineering (MIMSE), MUST-SUDA Joint Research Center for Advanced Functional Materials, Zhuhai MUST Science and Technology Research Institute, Macau University of Science and Technology, Taipa, 999078, Macau, PR China

<sup>c</sup>Jiangsu Key Laboratory of Advanced Negative Carbon Technologies, Soochow University, Suzhou, 215123, Jiangsu, PR China

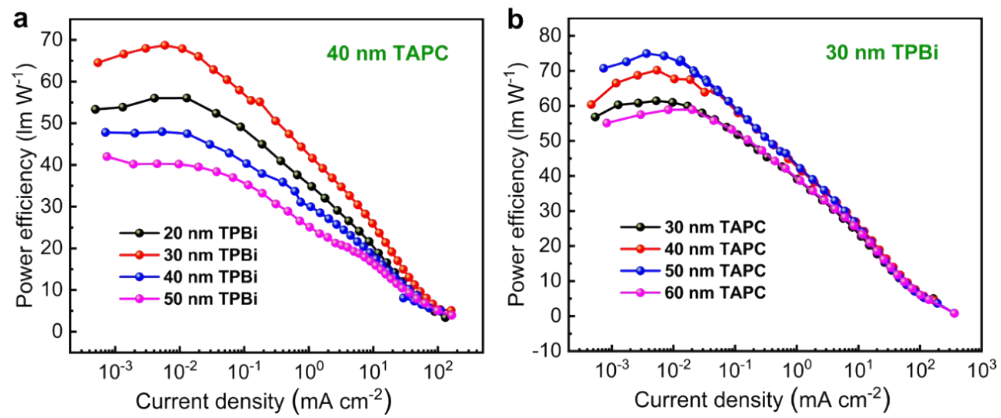

**Fig. S1.** (a) Power efficiency-current density ( $PE$ - $J$ ) curves of 40 nm thick TAPC-based POTLEDs with  $x$  nm TPBi ( $x = 20, 30, 40, 50$ , respectively) and (b)  $PE$ - $J$  curves of 30 nm thick TPBi-based POTLEDs with  $y$  nm TAPC ( $y = 30, 40, 50, 60$ , respectively).

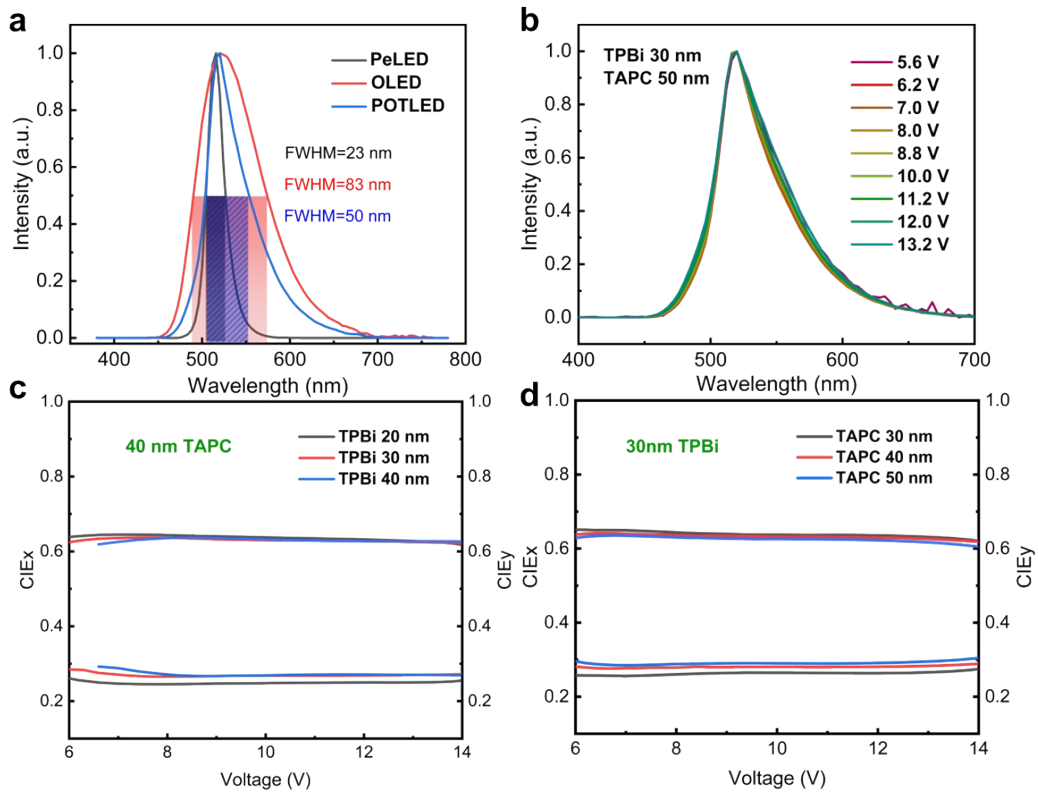

**Fig. S2.** (a) Electroluminescence (EL) spectra of PeLED, OLED and POTLED. (b) EL spectra of 30 nm thick TPBi and 50 nm thick TAPC based POTLED under different applied voltages. (c-d) CIE coordinates of the POTLED devices based on different TPBi and TAPC thicknesses under different applied voltages.

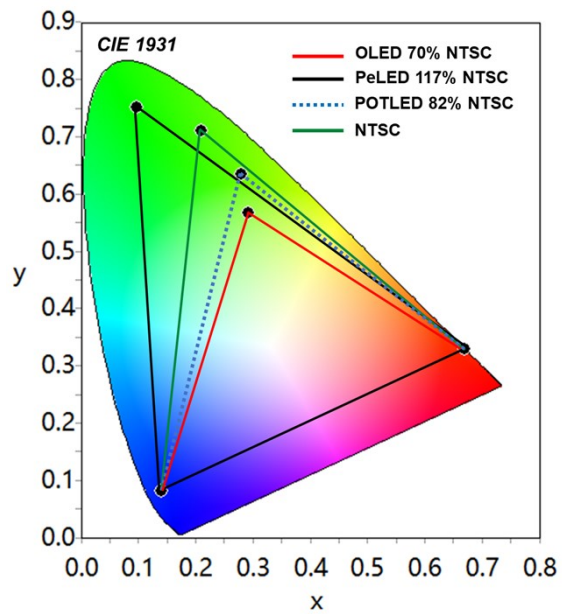

**Fig. S3.** Color gamut of OLED, PeLED, and POTLED with fixed blue and red CIE coordinates with the NTSC standards in a CIE 1931 chromaticity diagram.

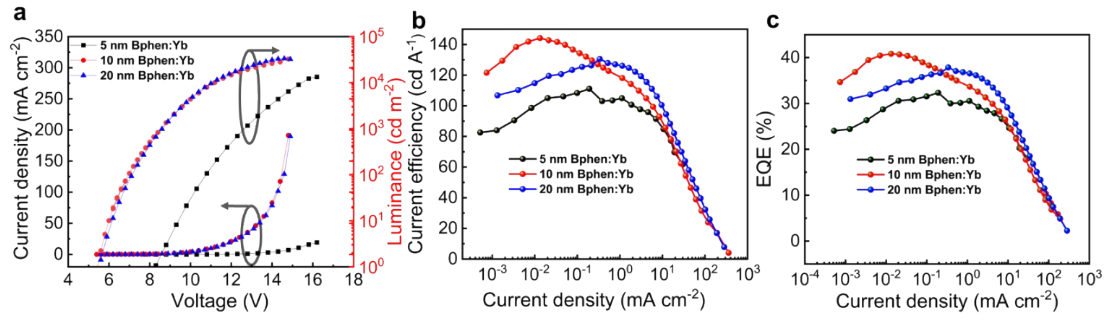

**Fig. S4.** (a) Current density and luminance versus voltage ( $J-V-L$ ) plots of POTLEDs with  $x$  nm Bphen:Yb ( $x = 5, 10, 20$ , respectively) and (b) corresponding current efficiency-current density ( $CE-J$ ) curves of the devices and (c) corresponding external quantum efficiency-current density ( $EQE-J$ ) curves of the devices.

**Table S1.** Performance of POTLED devices with different TPBi thicknesses.

| <b>TPBi<sup>a</sup></b><br><b>(nm)</b> | <b><math>V_{on}</math><sup>b</sup></b><br><b>(V)</b> | <b><math>CE_{max}</math></b><br><b>(cd A<sup>-1</sup>)</b> | <b><math>EQE_{max}</math></b><br><b>(%)</b> | <b><math>PE_{max}</math></b><br><b>(lm W<sup>-1</sup>)</b> | <b><math>L_{max}</math></b><br><b>(cd m<sup>-2</sup>)</b> | <b>CIE<sup>c</sup></b><br><b>(x, y)</b> |
|----------------------------------------|------------------------------------------------------|------------------------------------------------------------|---------------------------------------------|------------------------------------------------------------|-----------------------------------------------------------|-----------------------------------------|
| 20.0                                   | 5.2                                                  | 110.6                                                      | 33.1                                        | 56.1                                                       | 20030.0                                                   | (0.246, 0.641)                          |
| 30.0                                   | 5.4                                                  | 130.3                                                      | 37.8                                        | 68.7                                                       | 36890.0                                                   | (0.256, 0.642)                          |
| 40.0                                   | 6.8                                                  | 117.9                                                      | 34.1                                        | 48.0                                                       | 31180.0                                                   | (0.271, 0.629)                          |
| 50.0                                   | 7.2                                                  | 110.6                                                      | 32.3                                        | 42.0                                                       | 30660.0                                                   | (0.274, 0.625)                          |

<sup>a</sup> POTLED devices with the TAPC thickness of 40 nm; <sup>b</sup> the voltage at the luminance of 1 cd m<sup>-2</sup>; <sup>c</sup> Commission International de l'Eclairage at about 1000 cd m<sup>-2</sup>.

**Table S2.** Performance of POTLED devices with different TAPC thicknesses.

| <b>TAPC<sup>a</sup></b><br><b>(nm)</b> | <b><math>V_{\text{on}}</math><sup>b</sup></b><br><b>(V)</b> | <b><math>CE_{\text{max}}</math></b><br><b>(cd A<sup>-1</sup>)</b> | <b><math>EQE_{\text{max}}</math></b><br><b>(%)</b> | <b><math>PE_{\text{max}}</math></b><br><b>(lm W<sup>-1</sup>)</b> | <b><math>L_{\text{max}}</math></b><br><b>(cd m<sup>-2</sup>)</b> | <b>CIE<sup>c</sup></b><br><b>(x, y)</b> |
|----------------------------------------|-------------------------------------------------------------|-------------------------------------------------------------------|----------------------------------------------------|-------------------------------------------------------------------|------------------------------------------------------------------|-----------------------------------------|
| 30.0                                   | 5.4                                                         | 118.3                                                             | 35.1                                               | 61.5                                                              | 37690.0                                                          | (0.249, 0.638)                          |
| 40.0                                   | 5.4                                                         | 135.4                                                             | 39.0                                               | 70.2                                                              | 35450.0                                                          | (0.261, 0.642)                          |
| 50.0                                   | 5.4                                                         | 144.2                                                             | 41.1                                               | 75.0                                                              | 32630.0                                                          | (0.280, 0.635)                          |
| 60.0                                   | 5.4                                                         | 116.3                                                             | 33.3                                               | 58.9                                                              | 29790.0                                                          | (0.289, 0.629)                          |

<sup>a</sup> POTLED devices with the TPBi thickness of 30 nm; <sup>b</sup> the voltage at the luminance of 1 cd m<sup>-2</sup>; <sup>c</sup> Commission International de l'Eclairage at about 1000 cd m<sup>-2</sup>.

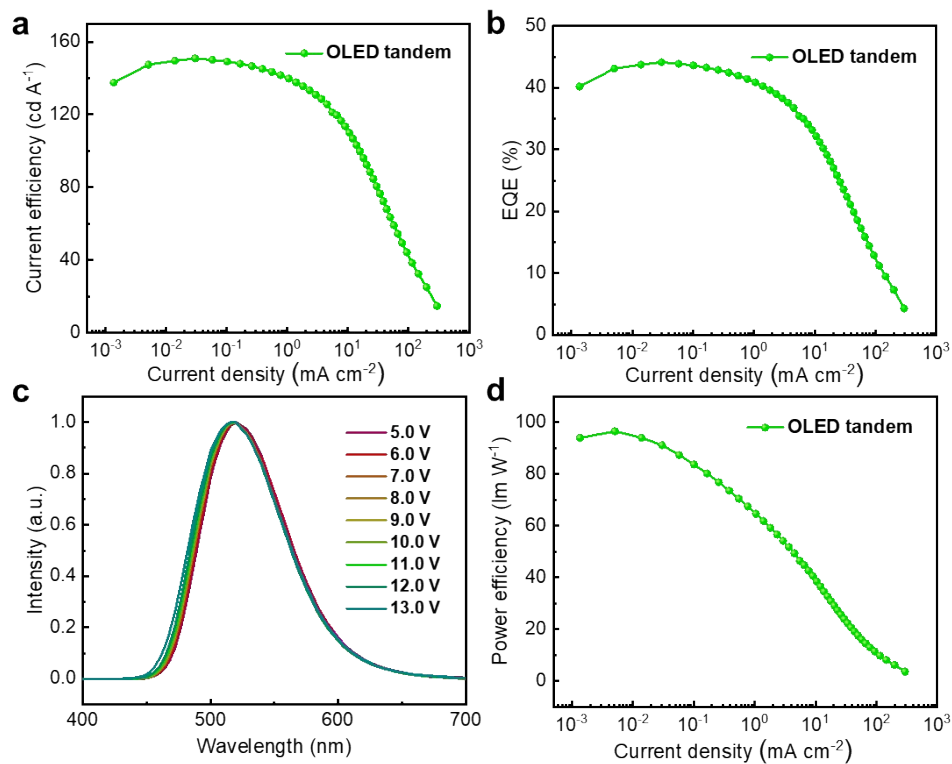

**Fig. S5.** (a)  $CE-J$ , and (b)  $EQE-J$  plots of the tandem OLED device. (c) EL spectra of the OLED tandem device under different applied voltages. (d)  $PE-J$  curve of the tandem OLED device.



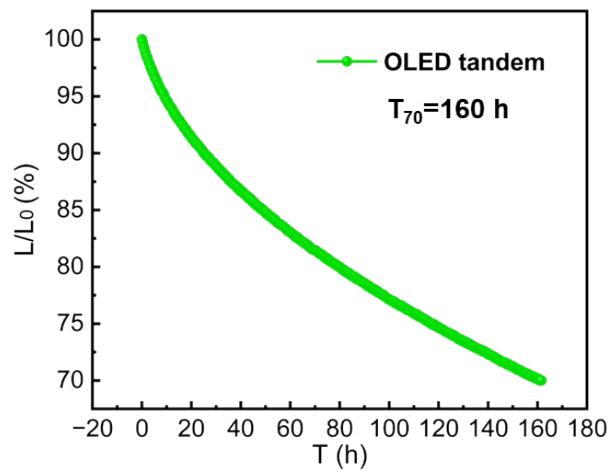

**Fig. S6.** Lifetime of tandem OLED at the initial brightness of  $100 \text{ cd m}^{-2}$ .

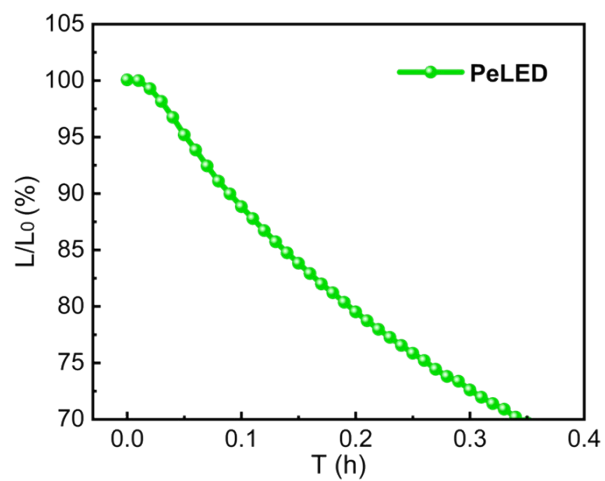

**Fig. S7.** Lifetime of PeLED at the initial brightness of  $100 \text{ cd m}^{-2}$ .
